# Supplementary material for: The Transcription Factor CsAtf1 Negatively Regulates the Cytochrome P450 Gene CsCyp51G1 to Increase Fludioxonil Sensitivity in Colletotrichum siamense
Source: MDPI journal article supplement (doi:10.3390/jof8101032), 2022-09-29
Supplement: s1 [file s1]

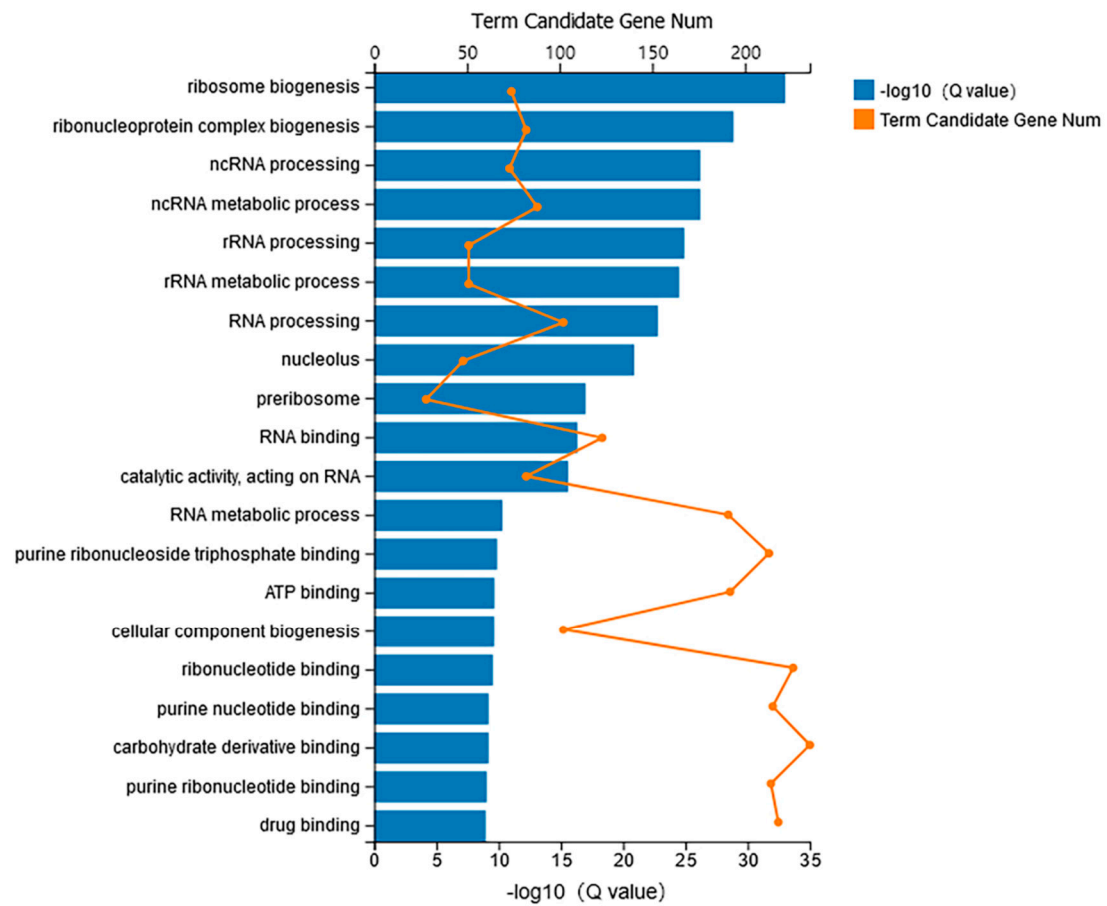

**Figure S1.** Gene Ontology enrichment terms of significantly up-regulated genes in  $\Delta CsAtf1$  mutant.

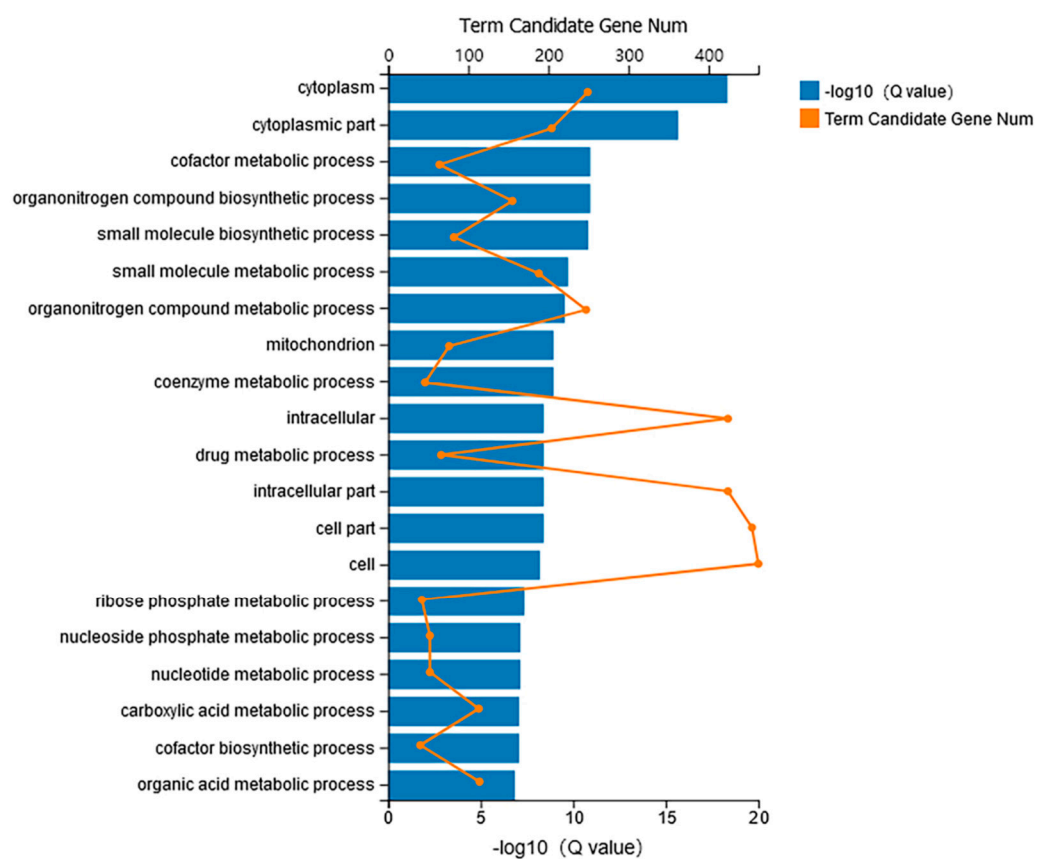

**Figure S2.** Gene Ontology enrichment terms of significantly down-regulated genes in  $\Delta CsAtf1$  mutant.

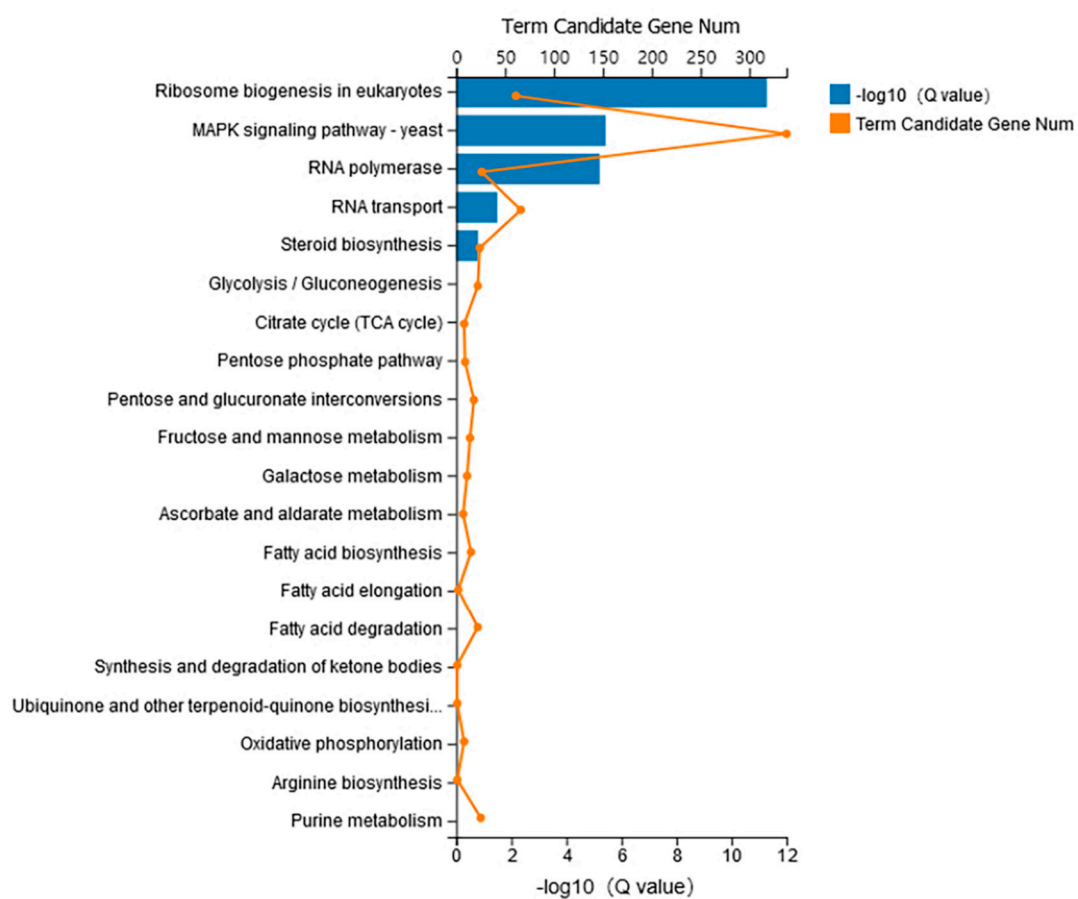

**Figure S3.** KEGG enrichment pathways of significantly up-regulated genes in  $\Delta CsAtf1$  mutant.

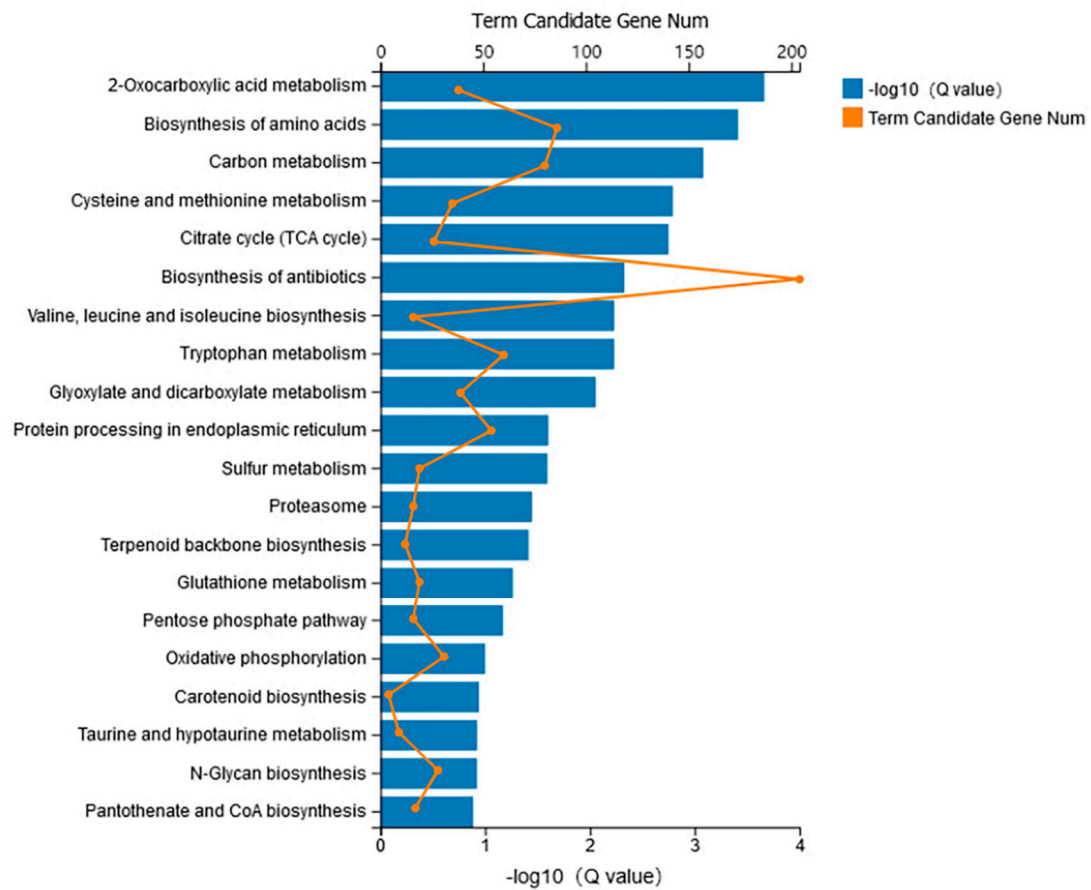

**Figure S4.** KEGG enrichment pathways of significantly down-regulated genes in  $\Delta CsAtf1$  mutant.

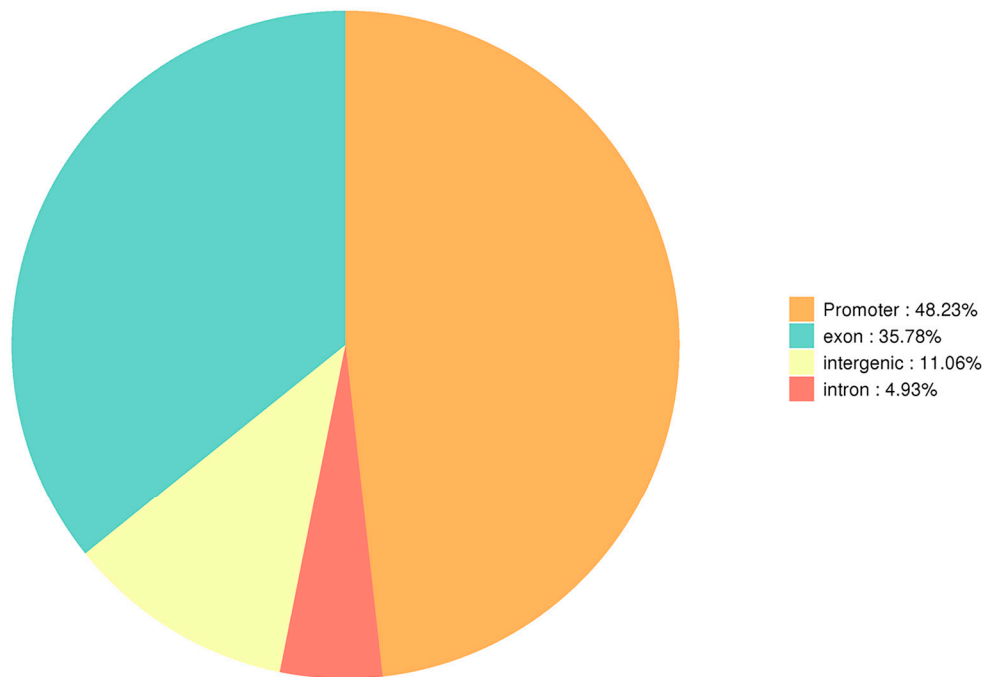

**Figure S5.** Venn pie chart of peak distribution of CsAtf1 DNA binding sites in the genome.

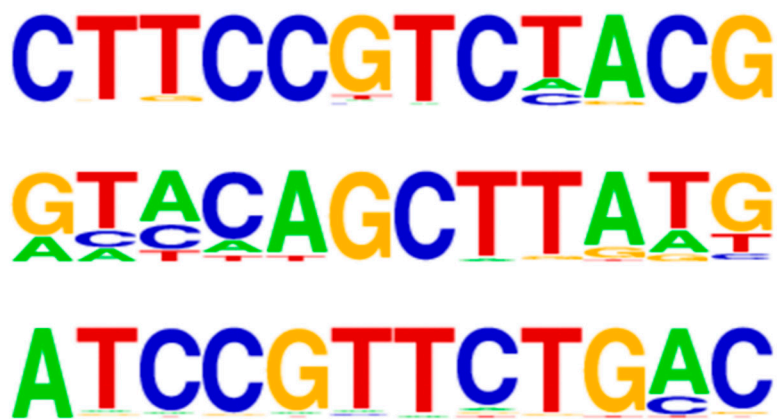

**Figure S6.** Sequence logos showing the three most enriched motifs in ChIP-seq. The size of the base represented the possibility of the base appearing.

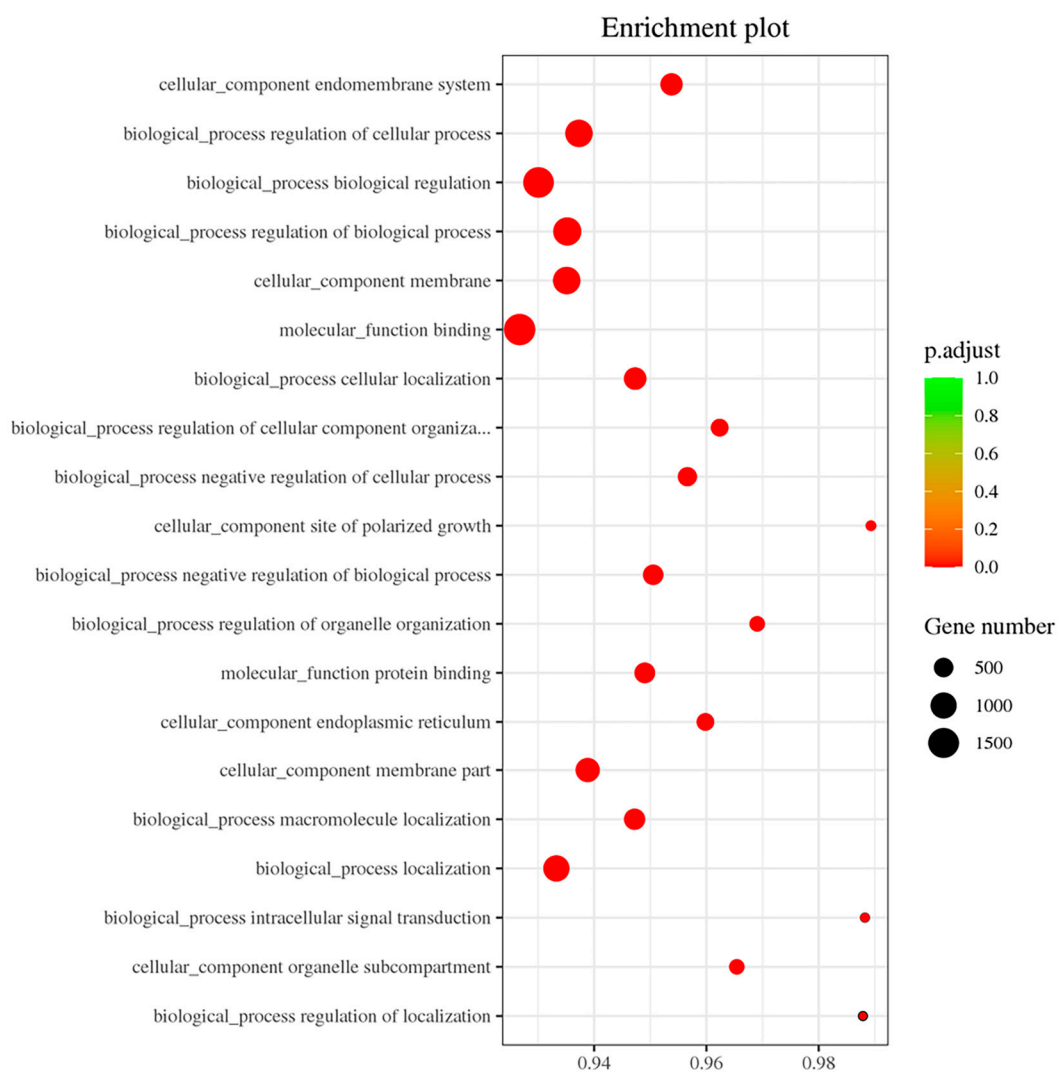

**Figure S7.** GO enrichment analyses of genes probably affected by CsAtf1.

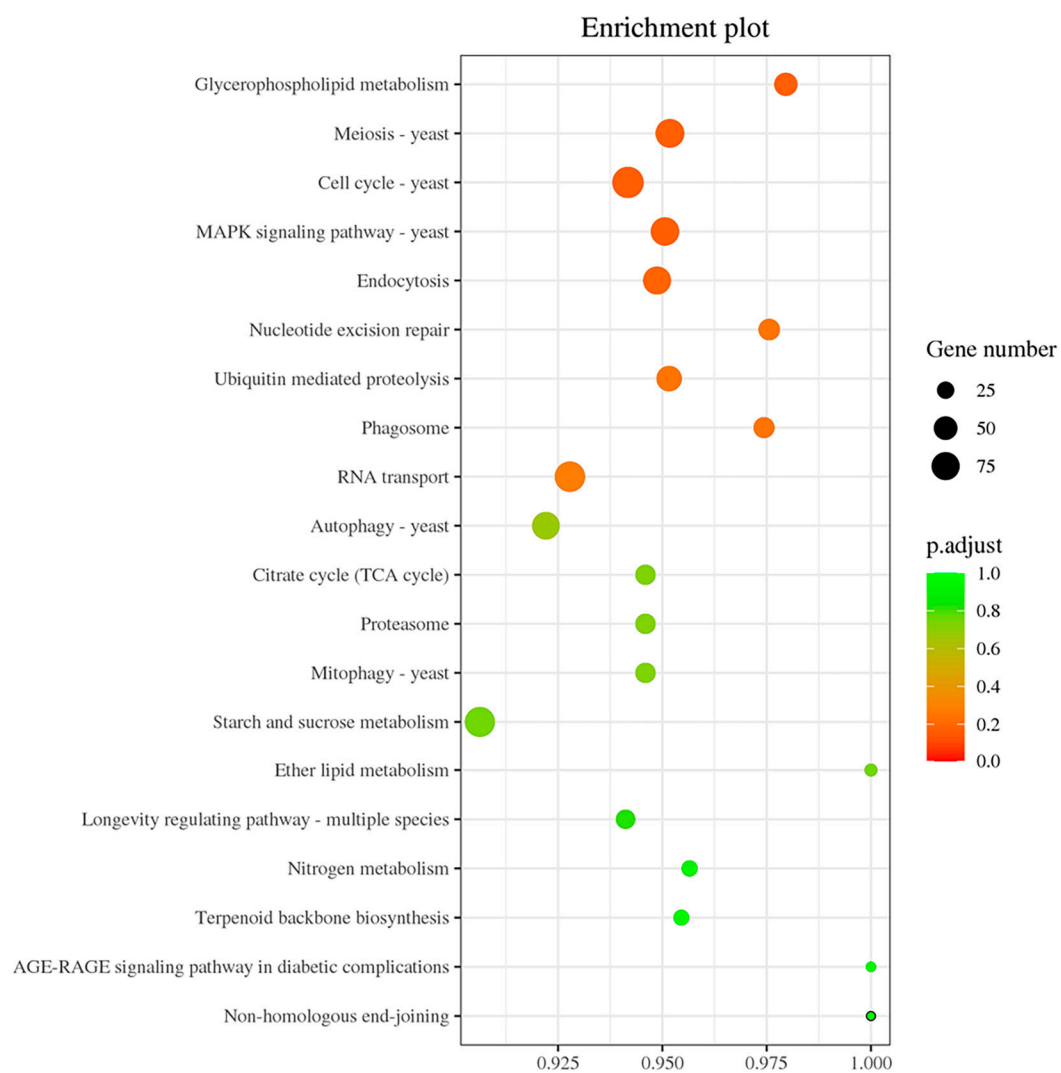

**Figure S8.** KEGG enrichment analyses of genes probably affected by CsAtf1.

**Table S1.** List of primers used in the study.

| Primer name              | sequence (5'- 3')                               |
|--------------------------|-------------------------------------------------|
| <i>CsCyp51G1</i> -RT-F   | AGAGTCGGGAGTTGGATTT                             |
| <i>CsCyp51G1</i> -RT-R   | GCTGTTCTTTGCGTAGGAG                             |
| <i>CsCyp51G1</i> -1F     | CAGACAACCGATGGAAGG                              |
| <i>CsCyp51G1</i> -2R     | ATAGGCATTGATGTGTTGACCTCCAAAGTGGACTATGGAGGGAG    |
| <i>CsCyp51G1</i> -3F     | TATTGCACGGGAATTGCATGCTCTCACCCCGATGTAAGGTGCCAGTT |
| <i>CsCyp51G1</i> -4R     | CCGCCCCTCTTTTCGTCAA                             |
| <i>CsCyp51G1</i> -5F     | ATGCGGGATATGCGAACGTTG                           |
| <i>CsCyp51G1</i> -6R     | CTTCCTCGCTCACCTCATAGT                           |
| <i>CsCyp51G1</i> -OF     | AGACAGGCACAGACAGACCACG                          |
| <i>CsCyp51G1</i> -OR     | CTGCTACTCTCAACCTAACCAC                          |
| <i>CsCyp51G1</i> -pF     | AAGTGACATGCTGACCATTCC                           |
| <i>CsCyp51G1</i> -pR     | AGTAGCCACAACCAGGTCG                             |
| <i>QCsCyp51G1</i> -Y1H-F | CGGAATTCGTGAGATTTAGGTCGGCATCG                   |
| <i>QCsCyp51G1</i> -Y1H-R | CGAGCTCCTTTTCGTCTCAAAGTGGACT                    |
| <i>CsAtf1</i> -OF        | ATGGGAACTTCGCCGACCGAC                           |
| <i>CsAtf1</i> -OR        | TCATGAGAAACGTCGCTGGA                            |
| <i>CsAtf1</i> -Y1H-F     | CGGAATTCATGGGAACTTCGCCGACCGAC                   |
| <i>CsAtf1</i> -Y1H-R     | CGGGATCCTCATGAGAAACGTCGCTGGA                    |
| Actin-F                  | TGGTATGGGCCAGAAGGA                              |
| Actin-R                  | GGACGGAAGGAGCGAACA                              |
| RP27-F                   | TTTCGTAGGAACCCAATCTTCAAAATGGCCGACCCGTTTGCG      |
| Stag-R                   | TACGTGCGCAGAGGAGCCTGAAT                         |
| S1F                      | GTGCCAACGCCACAGTGCCCCACA                        |
| S2R                      | R: GTGAGAGCATGCAATTCCCGTGCAATA                  |
| S2F                      | GGCGGTGCTATCCTTCCCGTGTT                         |
| S1R                      | GTTCAACGCCGCCTTCCGACAAAAT                       |
| M13F                     | TGTAAAACGACGGCCAGT                              |
| T7                       | TAATACGACTCACTATAGGG                            |
| pGADT7-F                 | TAATACGACTCACTATAGGGC                           |
| pGADT7-R                 | AGATGGTGCACGATGCACAG                            |



**Table S2.** Cytochrome oxidase related genes that probably directly regulated by CsAtf1.

| No. | Gene ID  | Description                                                                       | ChIP-Seq             |                       | RNA-Seq             |                                  |                |
|-----|----------|-----------------------------------------------------------------------------------|----------------------|-----------------------|---------------------|----------------------------------|----------------|
|     |          |                                                                                   | Peak ID              | Gene feature          | Average-fpk<br>m-WT | Average-fpkm-<br>$\Delta CsAtf1$ | Diffexp-log2fc |
| 1   | 43616755 | CYP51; sterol<br>14alpha-demethylase                                              | CsbZip_peak_781      | CGMCC3_g555:exon      | 42.90               | 59.20                            | 0.48           |
| 2   | 43615811 | Cytochrome P450<br>monooxygenase 3                                                | CsbZip_peak_657      | CGMCC3_g470:exon      | 6.66                | 3.87                             | -0.75          |
| 3   | 43618144 | COX7; cytochrome c<br>oxidase subunit 7                                           | CsbZip_peak_105<br>9 | CGMCC3_g680:Promoter  | 3747.92             | 2537.71                          | -0.54          |
| 4   | 43605293 | Cytochrome P450<br>monooxygenase                                                  | CsbZip_peak_224<br>9 | CGMCC3_g1156:Promoter | 3.68                | 1.51                             | -1.22          |
| 5   | 43613263 | COX5B; cytochrome c<br>oxidase subunit 5b                                         | CsbZip_peak_423<br>9 | CGMCC3_g2406:intron   | 4256.31             | 2884.18                          | -0.54          |
| 6   | 43613986 | QCR9, UCRC;<br>ubiquinol-cytochrome c<br>reductase subunit 9                      | CsbZip_peak_548<br>2 | CGMCC3_g3057:Promoter | 761.65              | 611.62                           | -0.29          |
| 7   | 43613986 | QCR9, UCRC;<br>ubiquinol-cytochrome c<br>reductase subunit 9                      | CsbZip_peak_548<br>3 | CGMCC3_g3057:Promoter | 761.65              | 611.62                           | -0.29          |
| 8   | 43613694 | SDHC, SDH3; succinate<br>dehydrogenase<br>(ubiquinone) cytochrome<br>b560 subunit | CsbZip_peak_825<br>1 | del_diff              | 293.01              | 362.13                           | 0.33           |
| 9   | 43615359 | SDHC, SDH3; succinate<br>dehydrogenase<br>(ubiquinone) cytochrome<br>b560 subunit | CsbZip_peak_825<br>2 | intergenic            | 293.01              | 362.13                           | 0.33           |
| 10  | 43616258 | CYC1, CYT1, petC;                                                                 | CsbZip_peak_886      | CGMCC3_g5101:Promoter | 1092.01             | 855.45                           | -0.33          |

|    |          |                                                                       |                       |                        |        |        |       |
|----|----------|-----------------------------------------------------------------------|-----------------------|------------------------|--------|--------|-------|
|    |          | ubiquinol-cytochrome c<br>reductase cytochrome c1<br>subunit          | 3                     |                        |        |        |       |
| 11 | 43616363 | Cytochrome P450 52A13                                                 | CsbZip_peak_910<br>1  | intergenic             | 34.27  | 10.04  | -1.73 |
| 12 | 43617987 | Cytochrome                                                            | CsbZip_peak_121<br>16 | CGMCC3_g6659:exon      | 4.02   | 1.126  | -1.72 |
| 13 | 43618357 | fabF, OXSM, CEM1;<br>3-oxoacyl-[acyl-carrier-prote<br>in] synthase II | CsbZip_peak_129<br>45 | CGMCC3_g6992:exon      | 17.06  | 25.28  | 0.58  |
| 14 | 43619211 | COX15, ctaA; cytochrome c<br>oxidase assembly protein<br>subunit 15   | CsbZip_peak_145<br>03 | CGMCC3_g7760:exon      | 142.75 | 60.51  | -1.21 |
| 15 | 43620252 | CYP51, Eburicol<br>14-alpha-demethylase                               | CsbZip_peak_163<br>80 | CGMCC3_g8698:Promoter  | 42.90  | 59.20  | 0.48  |
| 16 | 43603622 | SCS7, Ceramide very long<br>chain fatty acid hydroxylase              | CsbZip_peak_181<br>91 | CGMCC3_g10055:exon     | 437.22 | 462.13 | 0.07  |
| 17 | 43604191 | Cytochrome P450<br>monooxygenase                                      | CsbZip_peak_191<br>91 | intergenic             | 1.26   | 0.28   | -1.87 |
| 18 | 43605291 | QCR2, UQCRC2;<br>ubiquinol-cytochrome c<br>reductase core subunit 2;  | CsbZip_peak_212<br>19 | CGMCC3_g11558:exon     | 813.70 | 611.28 | -0.39 |
| 19 | 43605291 | QCR2, UQCRC2;<br>ubiquinol-cytochrome c<br>reductase core subunit 2   | CsbZip_peak_212<br>20 | CGMCC3_g11558:exon     | 813.70 | 611.28 | -0.39 |
| 20 | 43605973 | COX11, ctaG; cytochrome c<br>oxidase assembly protein<br>subunit 11   | CsbZip_peak_221<br>34 | CGMCC3_g12171:Promoter | 113.74 | 83.31  | -0.43 |
| 21 | 43606092 | Bifunctional cytochrome<br>P450/NADPH--P450                           | CsbZip_peak_223<br>24 | CGMCC3_g12279:Promoter | 12.76  | 22.86  | 0.83  |

|    |          |                                                        |                       |                        |         |         |       |
|----|----------|--------------------------------------------------------|-----------------------|------------------------|---------|---------|-------|
| 22 | 43606687 | reductase<br>COX5A; cytochrome c<br>oxidase subunit 5a | CsbZip_peak_230<br>63 | CGMCC3_g12814:exon     | 1653.85 | 1248.59 | -0.38 |
| 23 | 43606817 | Cytochrome P450 61                                     | CsbZip_peak_233<br>78 | CGMCC3_g12931:Promoter | 342.05  | 281.13  | -0.22 |
| 24 | 43610339 | CYP55, fungal nitric oxide<br>reductase                | CsbZip_peak_280<br>85 | CGMCC3_g16101:Promoter | 3.58    | 11.45   | 1.50  |

---
